# Supplementary material for: Discourse Context Immediately Overrides Gender Stereotypes during Discourse Reading: Evidence from ERPs
Source: MDPI journal article supplement (doi:10.3390/brainsci13030387), 2023-02-23
Supplement: s1 [file s1]

# Supplementary Materials

Table S1: Summary of cumulative link mixed model fitted with the Laplace approximation for the rating scores in the pretest of clause acceptability. Cumulative Link Mixed Model fitted with the Laplace approximation formula : `clmm (formula = rating ~ consistency + (consistency | sub) + (consistency | item), data = dis.pretest1.data`

|       |           |      |          |          |             |          |         |
|-------|-----------|------|----------|----------|-------------|----------|---------|
| link  | threshold | nobs | logLik   | AIC      | niter       | max.grad | cond.H  |
| logit | flexible  | 5110 | -5732.47 | 11498.93 | 2717(23545) | 4.07e-03 | 2.4e+03 |

Random effects:

| Groups | Name                    | Variance | Std.Dev. | Corr   |
|--------|-------------------------|----------|----------|--------|
| item   | (Intercept)             | 1.9801   | 1.4075   |        |
|        | consistency[consistent] | 0.1972   | 0.4441   | -0.094 |
| sub    | (Intercept)             | 2.8350   | 1.6837   |        |
|        | consistency[consistent] | 0.3190   | 0.5648   | 0.026  |

Number of groups: item 160, subject 32

Coefficients:

|                         | Estimate | Std. Error | z value | Pr(> z )     |
|-------------------------|----------|------------|---------|--------------|
| consistency[consistent] | 0.5932   | 0.1139     | 5.207   | 1.92e-07 *** |

Signif. codes: 0 '\*\*\*' 0.001 '\*\*' 0.01 '\*' 0.05 '.' 0.1 ' ' 1

Threshold coefficients:

|      | Estimate | Std. Error | z value |
|------|----------|------------|---------|
| 0 1  | -6.5277  | 0.3496     | -18.669 |
| 1 2  | -5.8537  | 0.3413     | -17.151 |
| 2 3  | -5.3241  | 0.3361     | -15.840 |
| 3 4  | -4.7659  | 0.3319     | -14.359 |
| 4 5  | -4.4929  | 0.3302     | -13.605 |
| 5 6  | -4.1136  | 0.3283     | -12.529 |
| 6 7  | -3.6870  | 0.3266     | -11.289 |
| 7 8  | -2.8480  | 0.3241     | -8.787  |
| 8 9  | -1.8924  | 0.3223     | -5.872  |
| 9 10 | -0.5484  | 0.3209     | -1.709  |

Table S2: Summary of cumulative link mixed model fitted with the Laplace approximation for the rating scores in the pretest of discourse fragment acceptability. Cumulative Link Mixed Model fitted with the Laplace approximation formula : `clmm (formula = rating ~consistency * context + (consistency * context | sub) + (consistency * context | item), data = dis.pretest2.data`

| link                                   | threshold                                | nobs | logLik   | AIC      | niter       | max.grad | cond.H  |
|----------------------------------------|------------------------------------------|------|----------|----------|-------------|----------|---------|
| logit                                  | flexible                                 | 5116 | -9936.31 | 19938.62 | 9706(50636) | 5.28e-03 | 2.3e+03 |
| Random effects:                        |                                          |      |          |          |             |          |         |
| Groups                                 | Name                                     |      | Variance | Std.Dev. | Corr        |          |         |
| item                                   | (Intercept)                              |      | 0.19171  | 0.4379   |             |          |         |
|                                        | consistency[consistent]                  |      | 0.07413  | 0.2723   | -0.296      |          |         |
|                                        | context[neutral]                         |      | 0.08386  | 0.2896   | 0.771       | 0.278    |         |
|                                        | consistency[consistent]:context[neutral] |      | 0.06078  | 0.2465   | 0.070       | -0.618   | -0.276  |
| sub                                    | (Intercept)                              |      | 1.50627  | 1.2273   |             |          |         |
|                                        | consistency[consistent]                  |      | 0.25609  | 0.5061   | -0.261      |          |         |
|                                        | context[neutral]                         |      | 0.26853  | 0.5182   | 0.422       | -0.692   |         |
|                                        | consistency[consistent]:context[neutral] |      | 0.36646  | 0.6054   | 0.165       | -0.828   | 0.837   |
| Number of groups: item 160, subject 32 |                                          |      |          |          |             |          |         |

Coefficients:

|                                          | Estimate | Std. Error | z value | Pr(> z )     |
|------------------------------------------|----------|------------|---------|--------------|
| consistency[consistent]                  | -0.66950 | 0.09613    | -6.965  | 3.29e-12 *** |
| context[neutral]                         | 0.54981  | 0.09830    | 5.593   | 2.23e-08 *** |
| consistency[consistent]:context[neutral] | 0.87280  | 0.11249    | 7.759   | 8.56e-15 *** |

Signif. codes: 0 '\*\*\*' 0.001 '\*\*' 0.01 '\*' 0.05 '.' 0.1 ' ' 1

Threshold coefficients:

|      | Estimate | Std. Error | z value |
|------|----------|------------|---------|
| 0 1  | -4.5418  | 0.2371     | -19.160 |
| 1 2  | -3.4049  | 0.2296     | -14.832 |
| 2 3  | -2.6898  | 0.2266     | -11.869 |
| 3 4  | -2.1765  | 0.2251     | -9.667  |
| 4 5  | -1.7014  | 0.2242     | -7.590  |
| 5 6  | -1.1591  | 0.2234     | -5.189  |
| 6 7  | -0.6348  | 0.2230     | -2.847  |
| 7 8  | 0.1338   | 0.2227     | 0.601   |
| 8 9  | 1.0955   | 0.2232     | 4.909   |
| 9 10 | 2.3425   | 0.2252     | 10.401  |
